# Supplementary material for: Harnessing salinity gradient energy in coastal stormwater runoff to reduce pathogen loading
Source: Royal Society of Chemistry journal article supplement (doi:10.1039/c9ew01137d), 2020-01-01
Supplement: c9ew01137d1.pdf [file c9ew01137d1.pdf]

## Electronic Supporting Information

### Harnessing Salinity Gradient Energy in Coastal Stormwater

### Runoff to Reduce Pathogen Loading

Kristian L. Dubrawski,<sup>a</sup> Wan Wang,<sup>a</sup> Jianqiao Xu,<sup>a</sup> and Craig S. Criddle <sup>\*ab</sup>

<sup>a</sup>*Department of Civil and Environmental Engineering, Stanford University, Stanford, California 94305, USA. E-mail: [ccriddle@stanford.edu](mailto:ccriddle@stanford.edu)*

<sup>b</sup>*Woods Institute for the Environment and the Department of Civil and Environmental Engineering, Stanford University, Stanford, California 94305, USA*

#### Mixing Entropy of Stormwater and Seawater

The amount of salinity gradient energy ( $\Delta G_{mix}$ ) that is available in the mixing of ocean water and stormwater is calculated by:<sup>1</sup>

$$\Delta G_{mix} = 2RT[V_{St}C_{St}\ln\frac{C_{St}}{C_M} + V_O C_O \ln\frac{C_O}{C_M}]$$

where  $C_{St}$  is the NaCl concentration (mol m<sup>-3</sup>) in the stormwater (e.g., 5 mM is similar to the average salinity found in stormwater monitoring studies),<sup>2</sup>  $C_O$  the NaCl concentration (mol m<sup>-3</sup>) in the ocean (e.g., 0.6 M),  $V_{St}$  the volume of stormwater (m<sup>3</sup>),  $V_O$  the volume of ocean water (m<sup>3</sup>),  $R$  the universal gas constant (8.314 J mol<sup>-1</sup> K<sup>-1</sup>), and  $T$  the absolute temperature in Kelvin.  $C_M$  is the NaCl concentration (mol m<sup>-3</sup>) after complete mixing of stormwater and ocean water:

$$C_M = \frac{V_{St}C_{St} + V_O C_O}{V_O + V_{St}}$$

19 Assuming that  $V_o \gg V_{st}$ , the maximum available  $\Delta G_{mix}$  approaches  $\sim 0.79 \text{ kWh m}^{-3}$  for the  
20 synthetic stormwater and seawater as the volume ratio approaches infinity. For the real  
21 stormwater and seawater, salinities were used to approximate NaCl concentration. An average  
22 salinity of 0.37 ppt and 33.4 ppt was found in the stormwater and seawater, respectively. The  
23 maximum available  $\Delta G_{mix}$  then approaches  $\sim 0.75 \text{ kWh m}^{-3}$  as the volume ratio approaches  
24 infinity, or 3780 J for the 1.4 L of inlet stormwater.

## 25 **Electrode Fabrication**

### 26 **Preparation of Prussian Blue (PB) Electrode**

27 We prepared Prussian Blue powder with a solution based reaction:

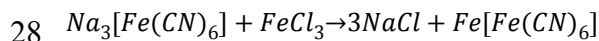

29 0.5 M sodium ferricyanide solution (Sigma-Aldrich) was first mixed with 0.5 M ferric chloride  
30 (Alfa Aesar) in a hydrochloric acid (Sigma) solution at pH=2. After 72 h of mixing, the sample  
31 was centrifuged and washed three times with deionized water, then dried in a vacuum oven. The  
32 PB powder was then coated on plain carbon cloth (275  $\mu\text{m}$  thickness, FuelCellEarth LLC) with a  
33 slurry-coating method. The slurry was prepared by mixing dry PB powder (85% wt.) with Super-  
34 P (TIMCAL, 8% wt.) and PVDF (MTI Inc., 7% wt.). We then added N-methyl pyrrolidone  
35 (NMP, Sigma) to the mixture as solvent, and stirred the ink overnight before coating the carbon  
36 cloth and drying in a vacuum oven for 24 h. To prevent attrition of the PB particles on the  
37 electrode, a  $\text{Na}^+$  permeable polyvinyl alcohol/sulfosuccinic acid (PVA/SSA) coating was also  
38 used, and prepared according to the literature.<sup>3,4</sup> A solution of PVA (99+% hydrolyzed, average  
39 molecular wt. 130,000, Sigma-Aldrich, 10% wt.), SSA (Sigma-Aldrich, 30% wt.) and DI water

40 (60% wt.) was stirred vigorously for 24 hours, then coated on the PB electrode with a scalpel  
41 blade. The electrode was then placed in an oven at 60 °C for one hour, 130 °C for another hour,  
42 and cooled to room temperature prior to using. PB mass loading was varied (a range of 3 to 21  
43 mg cm<sup>-2</sup>) for the 3 cm × 3 cm electrodes to determine the impact of mass loading on power  
44 production, mass loading was fixed at 7 mg cm<sup>-2</sup> for the 25 cm × 25 cm electrodes.

#### 45 **Preparation of Polypyrrole (PPy) Electrode**

46 We prepared the PPy electrode by electrochemically polymerizing PPy on plain carbon cloth  
47 (275 μm thickness, FuelCellEarth LLC) with a 0.1 M pyrrole (Sigma-Aldrich) solution in the  
48 presence of NaCl (1 M). An anodic current of 1 mA/cm<sup>2</sup> was applied for polymerization of PPy.  
49 The PPy electrode was then electrochemically reduced with a potentiostat (Biologic SP-50) in a  
50 0.6 M NaCl solution to a potential of 0.2 V vs Ag/AgCl (3.5 M KCl). Electropolymerization  
51 charge passed was varied (a range of 7.2 to 21.6 C cm<sup>-2</sup>) for the 3 cm × 3 cm electrodes to  
52 determine the impact of PPy mass loading on power production, charge passed was fixed at 14.4  
53 C cm<sup>-2</sup> for the 25 cm × 25 cm electrodes.

#### 54 **Synthetic and Real Waters**

##### 55 **Real water characterization**

56 On-site measurements of flowrate, turbidity, salinity, and temperature were taken daily for the  
57 duration of the in-ocean MEB bench-pilot experiments. All measurements were taken twice  
58 (n=2). Flowrate was measured by measuring the time by stopwatch to fill a 2.0 L graduated  
59 cylinder. Flowrate did not fluctuate significantly during the course of the experiments (Figure  
60 S1) and was thus measured just once per day. This was due to zero precipitation during the

61 period Feb 19 to Feb 21, 2019 for Half Moon Bay, CA (usclimatedata.com). Total precipitation  
62 between Feb 13, 2019 and Feb 18, 2019 totaled 2.47 inches (usclimatedata.com).  
63 50 mL samples were taken in clean sterile containers from the stormwater outfall (after passing  
64 through a 5  $\mu\text{m}$  UV-LED pre-filter) and immediately analyzed for salinity (factory calibrated by  
65 conductivity, SevenGo Duo, Mettler-Toledo), temperature (SevenGo Duo, Mettler-Toledo) and  
66 turbidity (DRT-15CE, HF Scientific). For enumeration of *Escherichia coli* concentration in  
67 source, treated, and control waters, the following methods were used: Source: 500 mL samples  
68 were taken in clean sterile containers from the stormwater outfall (after passing through a 5  $\mu\text{m}$   
69 factory-supplied pre-filter); Treated: 500 mL samples were taken in clean sterile containers after  
70 passing through the UV-LED module (but before entering the MEB); Control: 500 mL samples  
71 were taken in clean sterile containers after passing through the UV-LED module (but before  
72 entering the MEB), but with the UV-LED turned off. Enumeration samples were immediately  
73 stored in an insulated 4°C cooler. The samples were analyzed in the lab approximately 1 hr after  
74 collection by using a colorimetric-liquid-defined substrate assay (Colilert, IDEXX Laboratories).  
75 Samples were first decimally diluted and multiple dilutions were assayed. All dilutions that  
76 yielded measurements within the assay range of quantification were quantified using an MPN  
77 table provided by IDEXX. The assay detection limit was 10 most probable number (MPN) 100  
78  $\text{mL}^{-1}$ . Only *E.coli* was enumerated.

79

## 80 **MEB Construction and Operation**

### 81 **Single-cell MEB**

82 In the single-cell lab-scale system, the 3 cm  $\times$  3 cm MEB electrodes were placed in an  
83 acrylic plate-shape chamber with the dimension of 3 cm  $\times$  3 cm  $\times$  0.3 cm. The volume of the

84 chamber was 1.5 mL after embedding the PB electrode and the PPy electrode (Figure S2). A thin  
85 plastic mesh separated the electrodes, and a single titanium wire was used to connect the  
86 electrode to the external circuit in the cell. The electrode ends were connected to a variable  
87 resistor (5 – 5000  $\Omega$ ), a potentiostat (Bio-logic SP-50) was used to generate power curves by  
88 measuring the voltage and calculating the power across variable resistances. The cell was  
89 alternately flushed with synthetic stormwater (0.005 M NaCl) and seawater (0.6 M NaCl), power  
90 was measured directly after the saline stream flush.

### 91 **In-ocean bench-pilot**

92 In the bench-pilot system, 32 pairs of 25 cm  $\times$  25 cm PB and PPy electrode cells were stacked in  
93 a waterproof acrylic housing, each was hydraulically separated to prevent short-circuiting and  
94 each cell had a thin plastic mesh separator between the anode and cathode. Four titanium wires  
95 (spaced 5 cm apart) were used to connect the electrodes to the external circuit. The total internal  
96 liquid volume was 1.4 L. A single 25 cm  $\times$  25 cm cell pair was connected to a fixed resistor (5  
97  $\Omega$ ) to evaluate the impact of cycle duration on power production and energy capture in the lab  
98 using synthetic stormwater (0.005 M NaCl) and seawater (0.6 M NaCl). For in-ocean testing,  
99 cells were configured in four groups of cells in series, each with eight cells in parallel (Figure  
100 S3). The MEB voltage output was boosted to  $\sim$ 3.8 V with a bootstrap converter (VB0410, TXL  
101 Inc.) to store the captured SGE in a lithium ion battery (Panasonic NCR18650B). A manual  
102 switch was used to change polarity between stormwater and seawater flushes as the voltages  
103 were opposite polarities (Figure S4). For utilizing the SGE stored in the lithium ion battery, a  
104 DC-DC buck boost voltage converter (Eboot DSN6009) converted the Li-ion voltage ( $\sim$ 3.7 V) to  
105 8.8 V to power the UV-LED module (Eco Purifier,  $> 20 \text{ mJ cm}^{-2}$  at 260-275 nm peak wavelength

106 using Crystal IS Klaran WD UV-LEDs, Acuvatech Inc.) used to disinfect the inlet stormwater  
107 prior to entry into the MEB. The UV-LED module allowed a flowrate of 1.46 L min<sup>-1</sup>,  
108 consuming 7.4 W (measured experimentally). The UV-LED module shuts down if sufficient  
109 power is not supplied to the UV-LED. Figure S4 shows a photograph and circuit schematic of  
110 the system. An inline 5 µm pre-filter supplied by the manufacturer was used to aid in removing  
111 particulate matter.

112 Operation of the pilot was as follows: i) The MEB unit was placed on the ocean floor 0.3 m  
113 underwater (at low tide) in a protected cove and secured with weights and large rocks. The unit  
114 was placed in the ocean to avoid consuming energy for pumping ocean water to shore; ii) A tube  
115 from the stormwater outfall (approximately 50 m up shore) was run to the underwater MEB to  
116 supply the low salinity stormwater until the MEB unit was full (1.4 L). A solenoid valve on a  
117 timer was embedded in the acrylic MEB container to control this. Figure S3 shows the bench  
118 pilot unit prior to testing and underwater during testing; iii) The stormwater remained in the  
119 MEB unit for 6 hours while Na<sup>+</sup> and Cl<sup>-</sup> ions migrating out of the intercalation electrodes and  
120 into the stormwater (producing power). The output power was run back to shore via waterproof  
121 cables, the energy was captured and stored by the power electronics and battery (Figure S4),  
122 which supplied power to the adjacent UV-LED. Because of the lag between stormwater flow and  
123 energy capture, the first stormwater flush did not power the UV-LED; iv) Air was supplied to the  
124 MEB unit (via the inlet hose with the exit solenoid valve open) by a pressurized tank for  
125 approximately 5 s to remove the stormwater into the ocean; v) the solenoid valve was left open  
126 for six hours to allow migration of seawater into the unit, Na<sup>+</sup> and Cl<sup>-</sup> ions migrated into the  
127 intercalation electrodes (also producing power); vi) air was supplied to the unit to remove the  
128 seawater; vii) the cycle repeated.

130 Challenges of the pilot operation were significant, which resulted in only 3 days of testing. The  
131 first several potential testing sites resulted in significant movement of the unit by waves and  
132 tides. Even with the protected cove site we chose, by day 3, waves had washed the unit to shore,  
133 and breakage corroded the electronics, resulting in only 3 days of in-ocean testing. We suggest  
134 subsequent testing to take place out of water to prevent these challenges, but close to sea level, in  
135 order to minimize pumping requirements of seawater to the MEB unit. However, this will require  
136 more efficient units to provide sufficient power for the pump.

### 137 **References**

- 138 1 J. Veerman, M. Saakes, S. J. Metz and G. J. Harmsen, Reverse electrodialysis:  
139 Performance of a stack with 50 cells on the mixing of sea and river water, *J. Memb. Sci.*,  
140 2009, **327**, 136–144.
- 141 2 P. Göbel, C. Dierkes and W. G. Coldewey, Storm water runoff concentration matrix for  
142 urban areas, *J. Contam. Hydrol.*, 2007, **91**, 26–42.
- 143 3 D. S. Kim, M. D. Guiver, S. Y. Nam, T. Il Yun, M. Y. Seo, S. J. Kim, H. S. Hwang and J.  
144 W. Rhim, Preparation of ion exchange membranes for fuel cell based on crosslinked  
145 poly(vinyl alcohol) with poly(styrene sulfonic acid-co-maleic acid), *J. Memb. Sci.*, 2006,  
146 **281**, 156–162.
- 147 4 Y.-J. Kim and J.-H. Choi, Improvement of desalination efficiency in capacitive  
148 deionization using a carbon electrode coated with an ion-exchange polymer, *Water Res.*,  
149 2010, **44**, 990–996.

150

151

### Supporting Figures

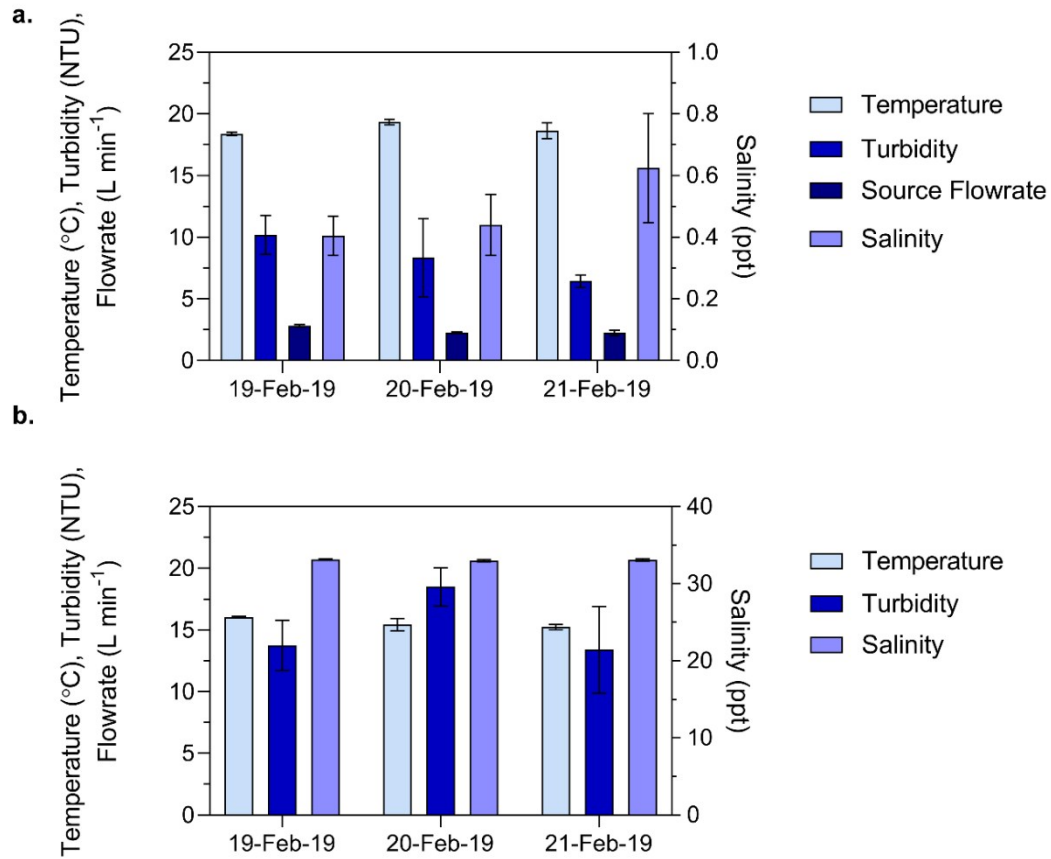

152

153 **Figure S1 – (a) Temperature, turbidity, flowrate, and salinity of stormwater at source from**  
154 **Feb 19, 2019 to Feb 21, 2019. (b) Temperature, turbidity, and salinity of seawater at in-**  
155 **ocean MEB site. n=2 for all measurements. Bar height represents mean, error bars**  
156 **represent standard deviation.**

157



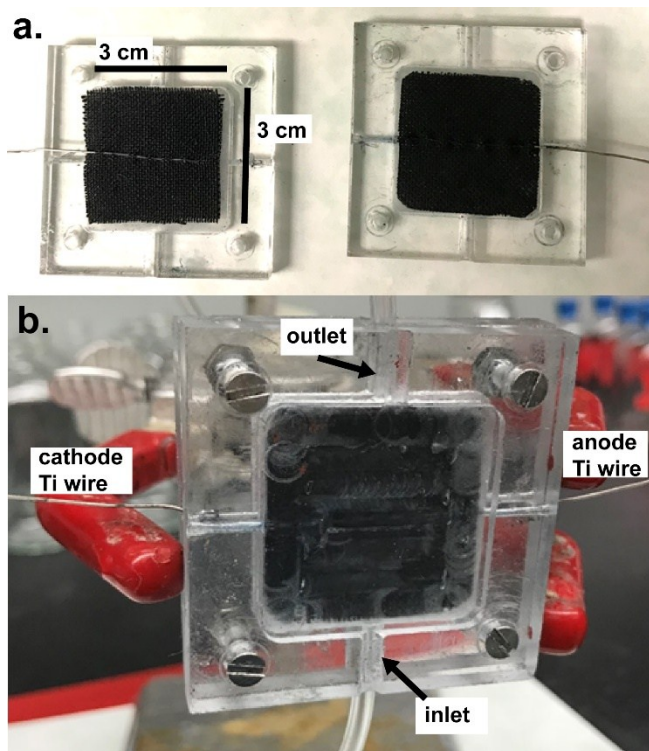

158  
159  
160  
161  
162

**Figure S2. (a) individual 3 cm × 3 cm electrodes, PB (right) and PPy (left) electrodes. (b) 3 cm × 3 cm electrode system assembly.**

163

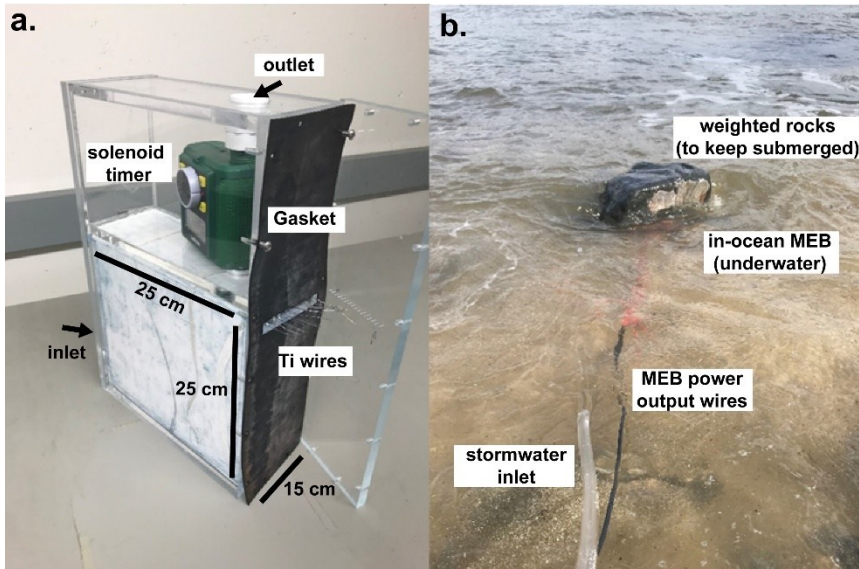

164

165

166

167

**Figure S3. (a) 25 cm × 25 cm bench-pilot MEB in lab, (b) 25 cm × 25 cm bench-pilot MEB operating underwater.**

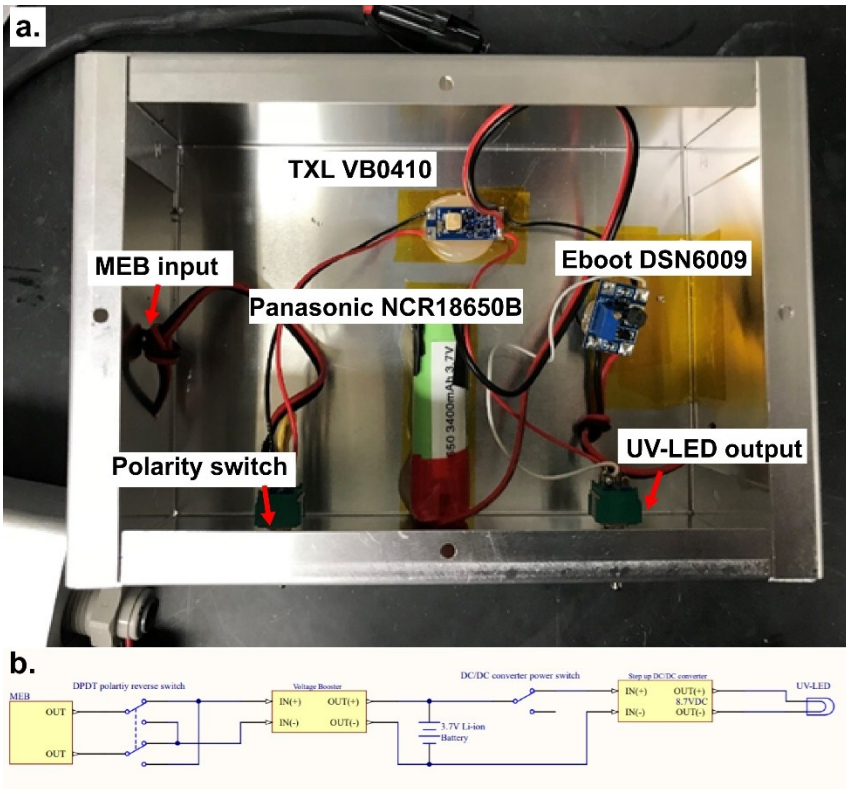

**Figure S4. (a) Internal circuitry for power capture and conversion. (b) Power electronics circuitry schematic.**

168  
 169  
 170  
 171  
 172

173

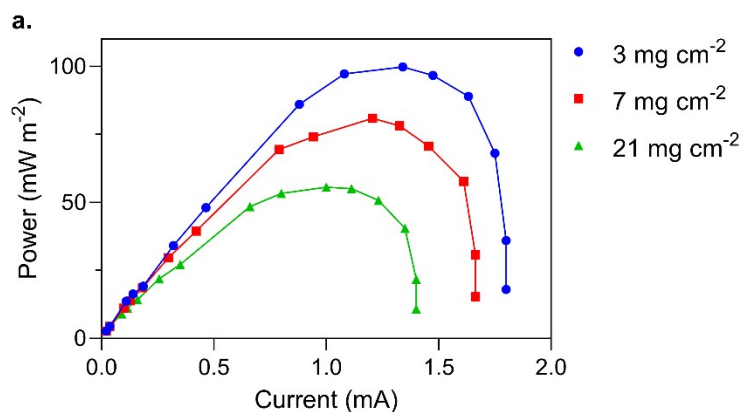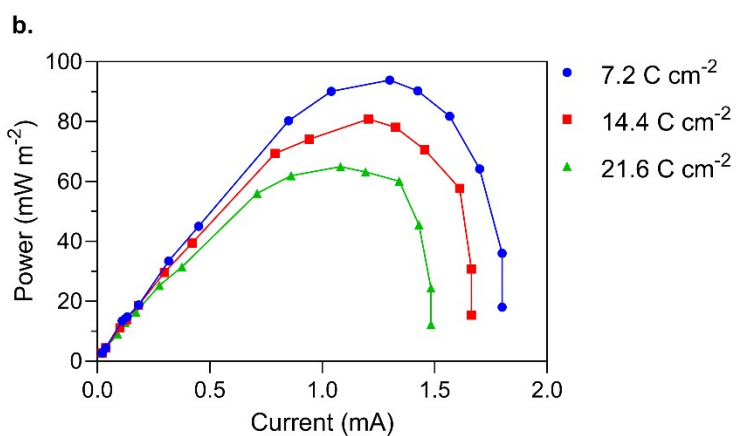

174

175 **Figure S5. (a) Impact of PB mass loading on power curves, PPy deposition charge of  $14.4 \text{ C cm}^{-2}$ .**  
176  **$\text{cm}^{-2}$ . (b) Impact of PPy deposition charge on power curves, PB mass loading of  $7 \text{ mg cm}^{-2}$ .**  
177 **All data for single  $3 \text{ cm} \times 3 \text{ cm}$  cell.**

178

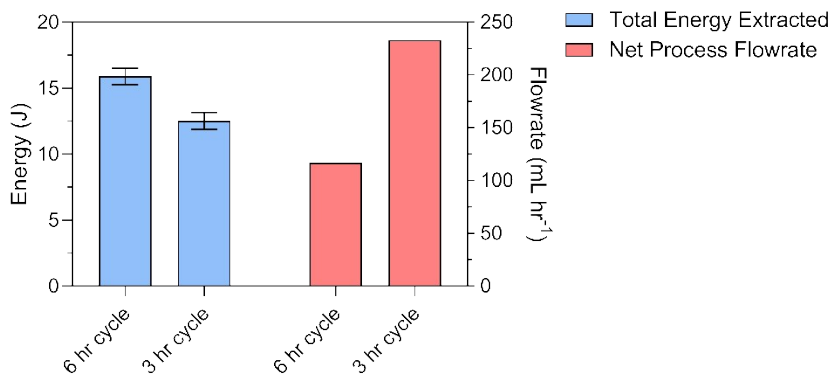

179

180 **Figure S6. Total energy extracted per cycle and net process flowrate for 3 hr and 6 hr cycle**  
 181 **duration times. Bar height represents mean, error bars represent standard deviations.**

182

183

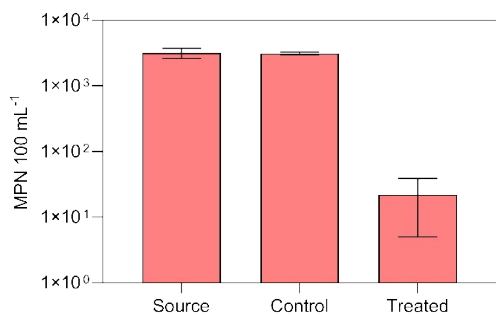

184

185 **Figure S7. (c) *E.coli* reduction by UV-LED and control for in-ocean system after 48 hr of**  
186 **pilot testing, n=2. Bar height represents mean, error bars represent standard deviations.**

187
